# Supplementary material for: Novel Umami Peptides from Hypsizygus marmoreus and Interaction with Umami Receptor T1R1/T1R3
Source: MDPI journal article supplement (doi:10.3390/foods12040703), 2023-02-06
Supplement: s1 [file s1]

---

Article

# Novel Umami Peptides from *Hypsizygus marmoreus* and Interaction with Umami Receptor T1R1/T1R3

Xiaobo Dong, Chao Wan, Aiyun Huang, Huaide Xu and Hongjie Lei \*

College of Food Science and Engineering, Northwest A&F University, Xianyang 712100, China

\* Correspondence: leihongjie@nwfau.edu.cn; Tel./Fax: +86-029-87092486

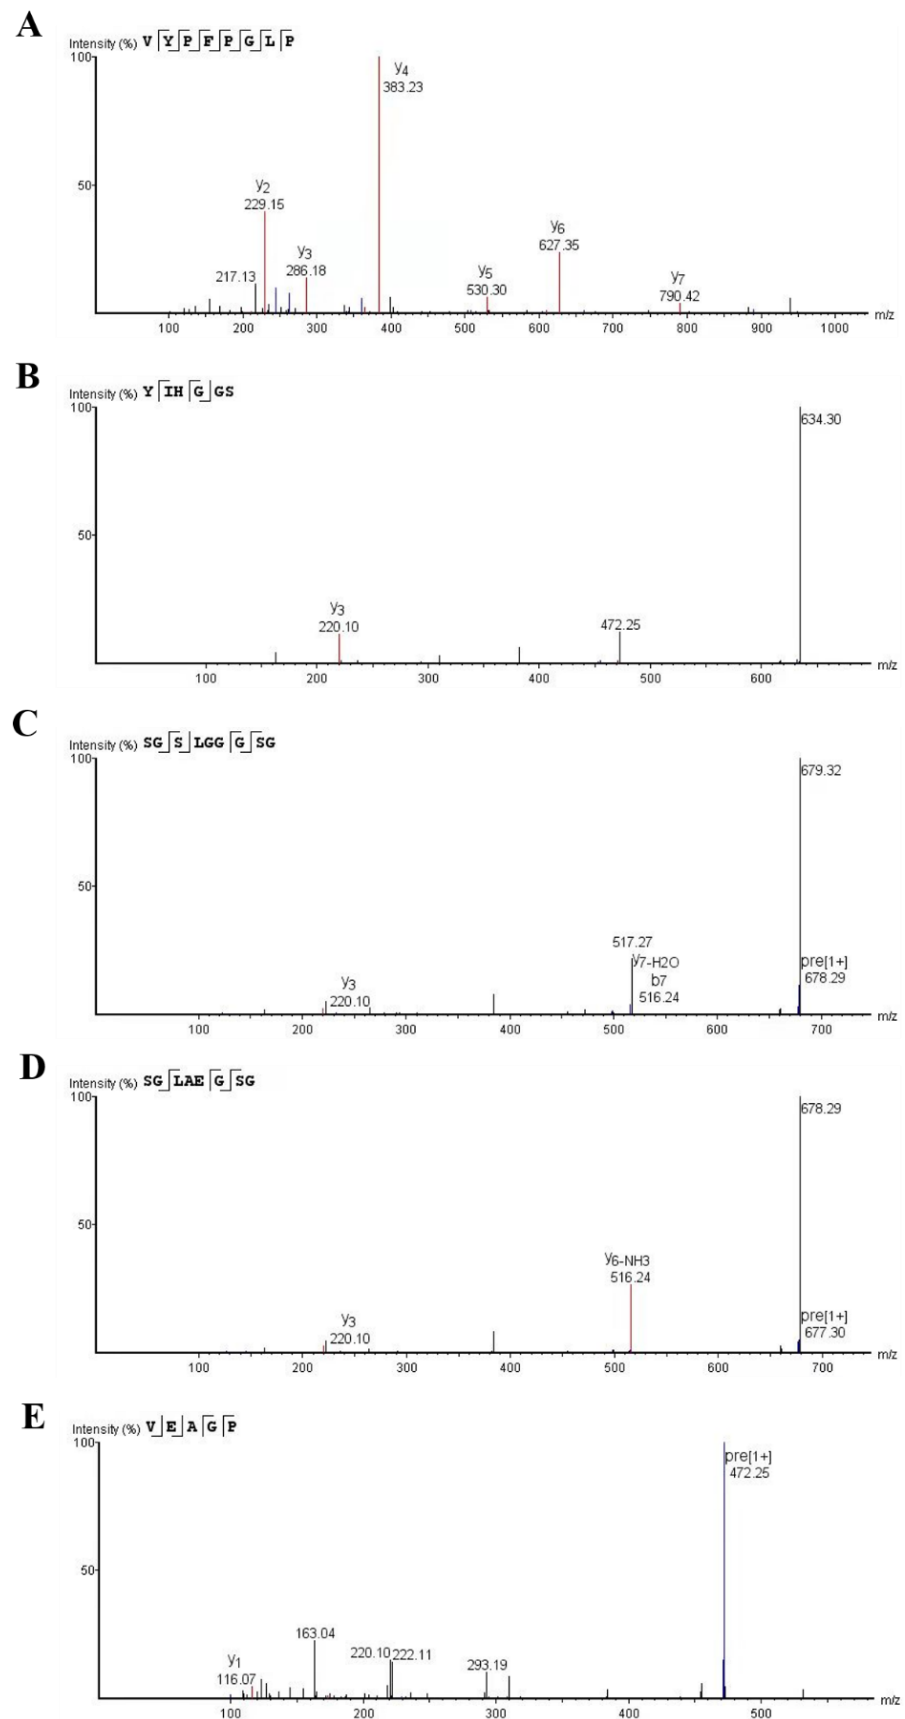

**Figure S1.** MS/MS spectrum of purified peptides. (A) VYPFFGPL, (B) YIHGGS, (C) SGLGGGSG, (D) SGLAEGSG, and (E) VEAGP.

**Table S1.** Free energy contributions of four Arg residues.

| Residue | Free energy (KJ/mol)    |                         |                        |                        |
|---------|-------------------------|-------------------------|------------------------|------------------------|
|         | $\Delta G_{\text{ele}}$ | $\Delta G_{\text{vdw}}$ | $\Delta G_{\text{PB}}$ | $\Delta G_{\text{SA}}$ |
| Arg151  | -14.45±3.05             | -0.39±0.05              | -2.95±0.57             | -0.00±0.01             |
| Arg277  | -122.22±4.34            | -6.16±1.25              | 106.28±7.99            | -2.72±0.05             |
| Arg307  | -9.08±0.95              | -3.32±2.25              | -7.15±1.98             | -0.31±0.29             |
| Arg365  | -17.31±6.25             | -5.91±1.30              | -4.03±1.66             | -1.01±0.06             |
